# Supplementary material
Source: PubMed Central journal article supplement (PMC3956161)
Supplement: 1320393111_pnas.201320393SI.pdf [file 1320393111_pnas.201320393SI.pdf]

# Supporting Information

Kratzer et al. 10.1073/pnas.1320393111

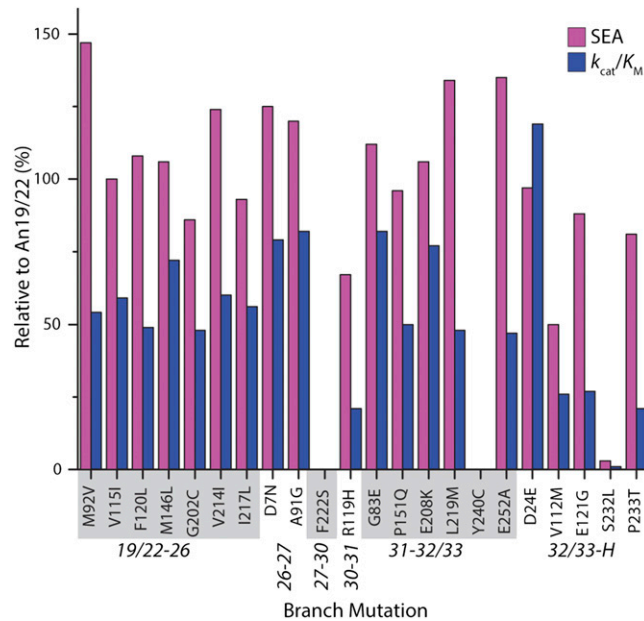

**Fig. S1.** Branch mutations that occur between An19/22 and the human uricase were individually inserted in An19/22 and assayed. Each of the 22 amino acid replacements (the number of replacements between An19/22 and the human uricase pseudogene) were assayed within the context of the An19/22 ancient protein to better understand the effects of individual mutations during mammalian uricase history. Each variant was characterized by the following properties: (i) the specific enzyme activity of the purified tetrameric variant (purple) and (ii) catalytic efficiency (i.e.,  $k_{cat}/K_m$ ) of the purified tetrameric variant (blue). All reported values are relative to the ancestral An19/22 enzyme. Two amino acid replacements, F222S and Y240C, prevented the purification of An19/22 variants and therefore their activity was not determined. The single S232L replacement could be purified, but its relative activity was severely diminished. Fig. 1 provides node numbers and branches.



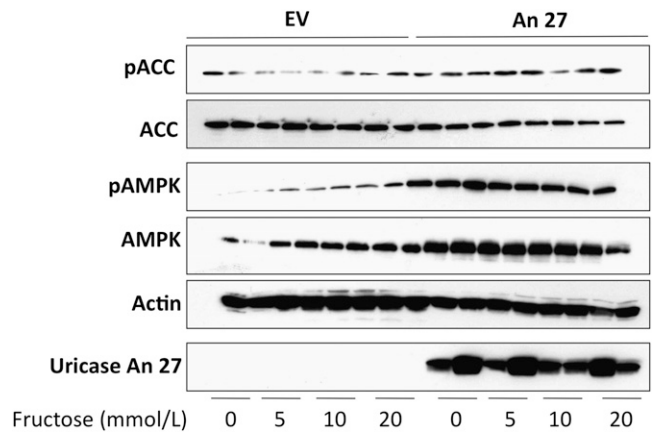

**Fig. 54.** Representative Western blot of lysates from HepG2 cells stably expressing an empty vector control or An27. ACC, Acetyl-Coa carboxylase; AMPK, AMP kinase; P, phosphorylated protein.

|         |            |            |             |             |            |             |     |
|---------|------------|------------|-------------|-------------|------------|-------------|-----|
|         |            | 10         | 20          | 30          | 40         | 50          | 60  |
| PBC     | MAHYRNDYK  | NDEVEFVRTG | YGKDMIKVLH  | IQRDGKYHSI  | KEVATSVQLT | LSSKKDYLHG  |     |
| An19/22 | MAHYHNDYK  | NDEVEFVRTG | YGKDMVKVLH  | IQRDGKYHSI  | KEVATSVQLT | LSSKKDYLHG  |     |
| An26    | MAHYHNDYK  | NDEVEFVRTG | YGKDMVKVLH  | IQRDGKYHSI  | KEVATSVQLT | LSSKKDYLHG  |     |
| An27    | MAHYHNNYK  | NDEVEFVRTG | YGKDMVKVLH  | IQRDGKYHSI  | KEVATSVQLT | LSSKKDYLHG  |     |
| An30    | MAHYHNNYK  | NDEVEFVRTG | YGKDMVKVLH  | IQRDGKYHSI  | KEVATSVQLT | LSSKKDYLHG  |     |
| An31    | MAHYHNNYK  | NDEVEFVRTG | YGKDMVKVLH  | IQRDGKYHSI  | KEVATSVQLT | LSSKKDYLHG  |     |
| An32/33 | MAHYHNNYK  | NDEVEFVRTG | YGKDMVKVLH  | IQRDGKYHSI  | KEVATSVQLT | LSSKKDYLHG  |     |
|         |            | 70         | 80          | 90          | 100        | 110         | 120 |
| PBC     | DNSDVIPTDT | IKNTVNVLAK | FKGIKSIETF  | AVTICEHFLS  | SFKHVIRAQV | YVEEVPWKR   | F   |
| An19/22 | DNSDIPTDT  | IKNTVHVLAK | FKGIKSIEAF  | AMNICEHFLS  | SFNHVIRAQV | YVEEVPWKR   | F   |
| An26    | DNSDIPTDT  | IKNTVHVLAK | FKGIKSIEAF  | AVNICEHFLS  | SFNHVIRAQV | YVEEIPWKR   | L   |
| An27    | DNSDIPTDT  | IKNTVHVLAK | FKGIKSIEAF  | GVNICEHFLS  | SFNHVIRAQV | YVEEIPWKR   | L   |
| An30    | DNSDIPTDT  | IKNTVHVLAK | FKGIKSIEAF  | GVNICEHFLS  | SFNHVIRAQV | YVEEIPWKR   | L   |
| An31    | DNSDIPTDT  | IKNTVHVLAK | FKGIKSIEAF  | GVNICEHFLS  | SFNHVIRAQV | YVEEIPWKR   | L   |
| An32/33 | DNSDIPTDT  | IKNTVHVLAK | FKEIKSIEAF  | GVNICEHFLS  | SFNHVIRAQV | YVEEIPWKR   | H   |
|         |            | 130        | 140         | 150         | 160        | 170         | 180 |
| PBC     | EKNGVKHVHA | FIYTPGTGHF | CEVEQIRNGP  | PVIHSGIKDL  | KVLKTTQSGF | EGFIKDQFTT  |     |
| An19/22 | EKNGVKHVHA | FIHTPTGTHF | CEVEQMRS GP | PVIHSGIKDL  | KVLKTTQSGF | EGFIKDQFTT  |     |
| An26    | EKNGVKHVHA | FIHTPTGTHF | CEVEQLRSGP  | PVIHSGIKDL  | KVLKTTQSGF | EGFIKDQFTT  |     |
| An27    | EKNGVKHVHA | FIHTPTGTHF | CEVEQLRSGP  | PVIHSGIKDL  | KVLKTTQSGF | EGFIKDQFTT  |     |
| An30    | EKNGVKHVHA | FIHTPTGTHF | CEVEQLRSGP  | PVIHSGIKDL  | KVLKTTQSGF | EGFIKDQFTT  |     |
| An31    | EKNGVKHVHA | FIHTPTGTHF | CEVEQLRSGP  | PVIHSGIKDL  | KVLKTTQSGF | EGFIKDQFTT  |     |
| An32/33 | EKNGVKHVHA | FIHTPTGTHF | CEVEQLRSGP  | QVIHSGIKDL  | KVLKTTQSGF | EGFIKDQFTT  |     |
|         |            | 190        | 200         | 210         | 220        | 230         | 240 |
| PBC     | LPEVKDRCFA | TQVYCKWRYH | QGRDVFDEAT  | WDTVRSIVLQ  | KFAGPYDKGE | YSPSVQKTLY  |     |
| An19/22 | LPEVKDRCFA | TQVYCKWRYH | QGRDVFDEAT  | WDTV RDIVLE | KFAGPYDKGE | YSPSVQKTLY  |     |
| An26    | LPEVKDRCFA | TQVYCKWRYH | QCRDVFDEAT  | WDTIRDLVLE  | KFAGPYDKGE | YSPSVQKTLY  |     |
| An27    | LPEVKDRCFA | TQVYCKWRYH | QCRDVFDEAT  | WDTIRDLVLE  | KFAGPYDKGE | YSPSVQKTLY  |     |
| An30    | LPEVKDRCFA | TQVYCKWRYH | QCRDVFDEAT  | WDTIRDLVLE  | KSAGPYDKGE | YSPSVQKTLY  |     |
| An31    | LPEVKDRCFA | TQVYCKWRYH | QCRDVFDEAT  | WDTIRDLVLE  | KSAGPYDKGE | YSPSVQKTLY  |     |
| An32/33 | LPEVKDRCFA | TQVYCKWRYH | QCRDVFDEAT  | WDTIRDLVME  | KSAGPYDKDE | YSPSVQKTLC  |     |
|         |            | 250        | 260         | 270         | 280        | 290         | 300 |
| PBC     | DIQVLSLSRV | PEIEDMEISL | PNIHYFNIDM  | SKMGLINKEE  | VLLPLDNPYG | KITGTV KRKL |     |
| An19/22 | DIQVLSLSRV | PEIEDMEISL | PNIHYFNIDM  | SKMGLINKEE  | VLLPLDNPYG | KITGTV KRKL |     |
| An26    | DIQVLSLSRV | PEIEDMEISL | PNIHYFNIDM  | SKMGLINKEE  | VLLPLDNPYG | KITGTV KRKL |     |
| An27    | DIQVLSLSRV | PEIEDMEISL | PNIHYFNIDM  | SKMGLINKEE  | VLLPLDNPYG | KITGTV KRKL |     |
| An30    | DIQVLSLSRV | PEIEDMEISL | PNIHYFNIDM  | SKMGLINKEE  | VLLPLDNPYG | KITGTV KRKL |     |
| An31    | DIQVLSLSRV | PEIEDMEISL | PNIHYFNIDM  | SKMGLINKEE  | VLLPLDNPYG | KITGTV KRKL |     |
| An32/33 | DIQVLSLSRV | PAIEDMEISL | PNIHYFNIDM  | SKMGLINKEE  | VLLPLDNPYG | KITGTV KRKL |     |
|         |            |            |             |             |            |             |     |
| PBC     | SSRL       |            |             |             |            |             |     |
| An19/22 | SSRL       |            |             |             |            |             |     |
| An26    | SSRL       |            |             |             |            |             |     |
| An27    | SSRL       |            |             |             |            |             |     |
| An30    | SSRL       |            |             |             |            |             |     |
| An31    | SSRL       |            |             |             |            |             |     |
| An32/33 | SSRL       |            |             |             |            |             |     |

**Fig. S5.** Ancestral and chimera uricase amino acid sequences. The aligned sequences are labeled according to Fig. 1 in the article and shown in 10-residue blocks. Each sequence is 304 aa long. Also shown is the pig-baboon chimera (PBC) uricase that represents the protein component of the US Food and Drug Administration-approved pegloticase and is included in this alignment for reference. Residues that differ from the human pseudogene are highlighted in gray (except for the two premature stop codons at position 33 and 187).

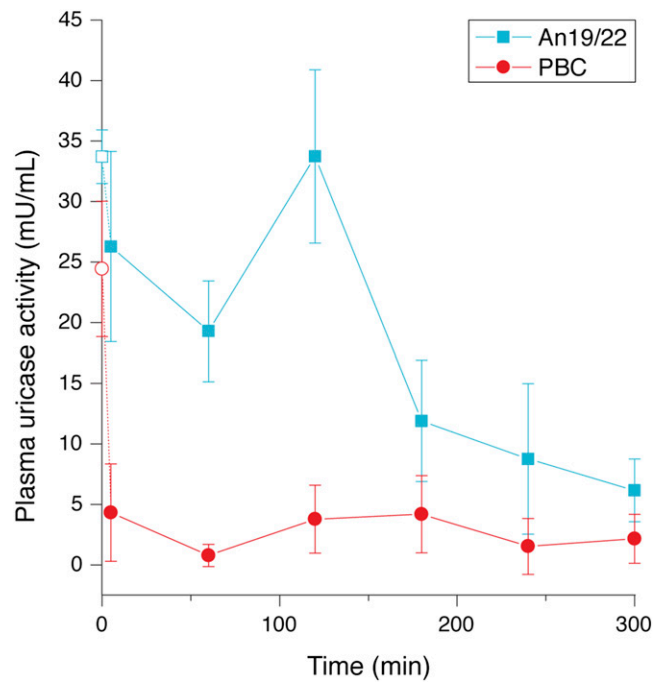

**Fig. 56.** Healthy rats injected with An19/22 displayed enhanced pharmacokinetics compared with the PBC uricase. Ten male Sprague–Dawley rats (five rats for each uricase) were each injected with 1 mL (0.2 mg/mL) of recombinant uricase preparations (An19/22 and PBC, the non-PEGylated form of pegloticase). One milliunit is the amount of uricase needed to oxidize 1 nM of urate per minute under assay conditions. The An19/22 uricase has a longer  $t_{1/2}$  compared with PBC uricase. A Student *t* test was performed with a *P* value of 0.02.



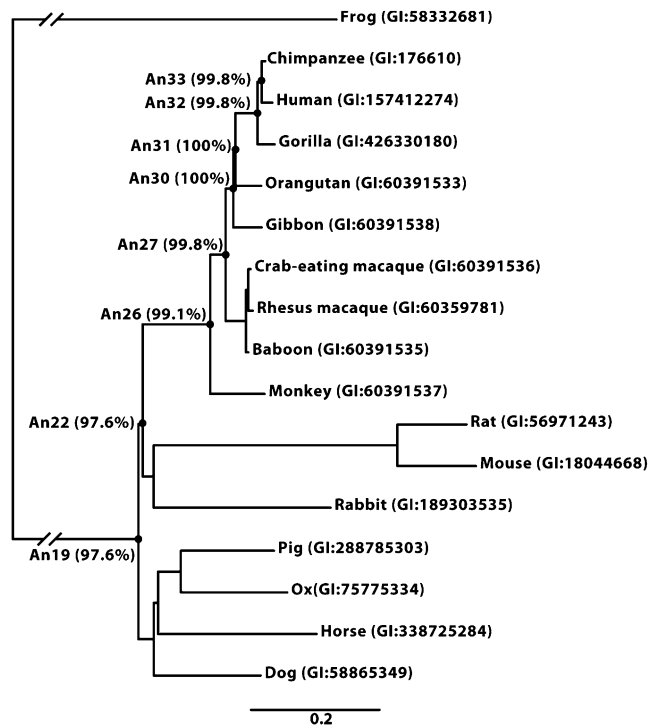

**Fig. S9.** Phylogram of uricases generated from a codon-based maximum likelihood analysis. The internal nodes are labeled with the posterior probability, a measure of statistical support, for each ancestral sequence inferred (note that these values are not nodal support). This phylogeny follows the inferred species tree for these organisms. The scale bar represents 0.2 replacements per site per unit evolutionary time. GenBank Identifier (GI) numbers are provided after each common species name.
